# Supplementary material for: Differential transcriptomic analyses revealed genes and signaling pathways involved in iono-osmoregulation and cellular remodeling in the gills of euryhaline Mozambique tilapia, Oreochromis mossambicus
Source: PubMed Central journal article supplement (PMC4213501; doi:10.1186/1471-2164-15-921), 2014-10-23
Supplement: 12864_2014_6609_MOESM5_ESM.pdf [file 12864_2014_6609_MOESM5_ESM.pdf]

**Table S2.** Primers and related information for quantitative real-time PCR.

| Gene symbol                     | 5'-Forward primer-3'   | 5'-Reverse primer-3'    | Amplicon size (bp) | Contig | Description                                                    |
|---------------------------------|------------------------|-------------------------|--------------------|--------|----------------------------------------------------------------|
| <i>aifm3</i>                    | CGCTTCCTGCCAATAAGTCT   | AGAGGAGAGAACGGGAAGGT    | 118                | 39602  | apoptosis-inducing factor 3                                    |
| <i>angptl7</i>                  | ACAAGCTCTTCCTTGCCAAC   | TGCACAGTCGTCCAACATT     | 116                | 28748  | angiopoietin-related protein 7                                 |
| <i>aqp1</i>                     | AGGGTTCAAGTGTGCTCCAC   | GGAATAGGTCTGGGCAATGA    | 129                | 66976  | aquaporin-1                                                    |
| <i>aqp3</i> (FW isoform)        | GTTGCTCCGTCCTGGAAGT    | TATGCCAGCCGTGTTGTTAG    | 55                 | 17845  | aquaporin-3                                                    |
| <i>aqp3</i> (SW isoform)        | GAACCCATCTCACCTTGTC    | GGCCAGAATGCAAACATATCAG  | 77                 | 17847  | aquaporin-3                                                    |
| <i>arhgap15</i>                 | CGCAGACAAGAATGGAGTGA   | TTCACGCTCACAGAGACTCG    | 136                | 28188  | rho GTPase-activating protein 15                               |
| <i>atp2b3/pmca3</i>             | GCACGAGCAGTGTGATGTT    | TCAACGAACTGACCTGCATC    | 139                | 14959  | plasma membrane calcium-transporting ATPase 3                  |
| <i>atpsyn beta</i> (FW isoform) | TCAAGATGTGCTGCTCTTCG   | TGGTGATACGCTCCTGCATA    | 149                | 79615  | ATP synthase subunit beta, mitochondrial-like                  |
| <i>atpsyn beta</i> (SW isoform) | TGCGGGAAGTTGAATCTAGG   | ATGTGCCTGCTGATGACTTG    | 138                | 1606   | ATP synthase subunit beta, mitochondrial-like                  |
| <i>casp6</i>                    | TTTGGCTTTCCAACAAGGTC   | CGGAGGCAGATCACTCAGAT    | 157                | 24696  | caspase-6                                                      |
| <i>ccnb1</i>                    | ATAATGGGCTGACCAAGCAC   | TTGCCAGGTCCTAACCACT     | 111                | 23792  | G2/mitotic-specific cyclin-B1                                  |
| <i>cdc45 variant 1</i>          | TTGAACACAAAGAGCAGTTTCG | CACAGATGAAGAAGATGGAGTCA | 108                | 27952  | cell division control protein 45 homolog, transcript variant 1 |
| <i>cenpf</i>                    | GGTGACGGTGCTAGAGAAGG   | CTCCAGTCCAGCAGAGCTT     | 109                | 29207  | centromere protein F, 350/400kDa (mitosin)                     |
| <i>cfr</i>                      | GGTGCCACAGAAAGTCTTCA   | CTTGTCTGGGAACTGCTCAA    | 139                | 100895 | cystic fibrosis transmembrane conductance regulator            |
| <i>clcc1</i>                    | GCTCATCCTCAGCAGTTCCT   | CTCAACAGCAACATGCCCTA    | 120                | 50805  | chloride channel CLIC-like protein 1                           |
| <i>clcn2/clc-2</i>              | GTTATTGCTGGGTGGGTTTG   | TGATCCTGTTGGGTTCCATT    | 149                | 30     | chloride channel protein 2                                     |
| <i>cldn8</i>                    | GAGGCTGTAGTGGCTGTTGAG  | GGCTTTCTGTTTGCTGGAG     | 131                | 19316  | claudin-8                                                      |
| <i>clic4</i>                    | ACTGGGCGACAGAATGGTAG   | GTACCGTGACTTTGCCATCC    | 137                | 2581   | chloride intracellular channel protein 4                       |
| <i>cox3</i>                     | AAGCCGGTTGCTACAAAGAA   | ATCCCTTGCCCTAACCATTC    | 126                | 79     | cytochrome c oxidase subunit III (mitochondrion)[Hs. homolog]  |

| Gene symbol               | 5'-Forward primer-3'   | 5'-Reverse primer-3'    | Amplicon size (bp) | Contig | Description                                               |
|---------------------------|------------------------|-------------------------|--------------------|--------|-----------------------------------------------------------|
| <i>ercc6</i>              | CCTCTGTCGGAGAAGCACTC   | CTCCATCTCGGAGTCATCGT    | 122                | 48759  | DNA excision repair protein ERCC-6                        |
| <i>foxi2</i>              | TGAGTGGAAGAGCTGTGCTG   | CGAGGATGACCCAGGTAAAG    | 137                | 51168  | forkhead box protein I2                                   |
| <i>gas2</i>               | GACATATCGCCAATGATCCA   | TGTGCAGCATCCGAATAAAG    | 114                | 58776  | growth arrest-specific protein 2                          |
| <i>gc-1</i>               | CCACGCCACTGTAGGTTTCT   | ACCCATCCGTCCCTTTCTAT    | 147                | 10608  | mitochondrial glutamate carrier 1                         |
| <i>ghr2</i>               | CTGAGGAACAGACCGAGAGG   | TCTGCATTTCATCACGAGGAG   | 106                | 51528  | growth hormone receptor II                                |
| <i>gpr64</i>              | GAAACAGCCACCCAGTTCAT   | ACCACAAAGCAGCCAACAG     | 106                | 21162  | G protein-coupled receptor 64 [Hs. homolog]               |
| <i>gspt2</i>              | TCTCTGATGACGTGGAGACG   | CAGGTTCTCGGCATTACACA    | 119                | 7827   | G1 to S phase transition 2                                |
| <i>hmx3a</i>              | GTTGTTGTTGTGCTCGTCGT   | GAGCCAGAGACTCCTCTCCA    | 113                | 17416  | homeobox protein HMX3-A                                   |
| <i>map3k15</i>            | GCAGGAGAAACATGCCAGAT   | CGGTTTCCAGTGCTGATTCT    | 110                | 26425  | mitogen-activated protein kinase kinase kinase 15         |
| <i>msh2</i>               | AATGACGCCTTCACCAGGTA   | TGAATGCAGTGTTCTCTCG     | 127                | 1800   | DNA mismatch repair protein Msh2                          |
| <i>ncc</i>                | CACAAAATACCACCCTCGTG   | CACAAGCACTACAGGGCAGT    | 122                | 11563  | Na-Cl cotransporter (NCC)                                 |
| <i>nd1</i>                | AAGGGCTCCTGCATATTCT    | ACTAATCCTTCCCGCCTGAC    | 140                | 4520   | NADH dehydrogenase subunit 1 (mitochondrion)[Hs. homolog] |
| <i>nkaa1</i> (FW isoform) | TCCTGGCTGAACAGAACAAA   | AACAGATCCACAGCACAGCTC   | 104                | 2955   | sodium/potassium-transporting ATPase subunit alpha-1      |
| <i>nkaa1</i> (SW isoform) | CATGCTGCTGTGGATTGGTGCC | CCGGTGATGATGACGACAGCAGA | 129                | 4958   | sodium/potassium-transporting ATPase subunit alpha-1      |
| <i>nkaa3</i>              | GGCCGCATTGCTACTCTGACG  | ACGCCAAGAAGACAGCCACT    | 110                | 3864   | Sodium/potassium-transporting ATPase subunit alpha-3      |
| <i>nkcc1a</i>             | GGCCACCAGCCTCCAGAACA   | TCAGAGGGACTGTGGGCTCT    | 113                | 12232  | Na-K-Cl cotransporter (NKCC1alpha)                        |
| <i>rad54l</i>             | CCAGGATCTTATGGCTGCAT   | GTATCAGGGCTTTGGCGTAG    | 101                | 101281 | DNA repair and recombination protein RAD54-like           |
| <i>rhgb</i>               | AGTGACGGCTCCCACAATAG   | TCGGTTTCTTGGCTGGTATC    | 149                | 2262   | ammonium transporter Rh type B                            |
| <i>rock2</i>              | GAACGTCTTCAAGCCTCCAC   | CAGGAGGAGCAGTTCTTTGG    | 142                | 15583  | rho-associated protein kinase 2                           |
| <i>slc12a6</i>            | CGATTGCGCTCATTGATATG   | ATCTTGTTCTGCGGTTGAC     | 118                | 39140  | solute carrier family 12 member 6                         |
| <i>slc14a2/ut2</i>        | ACCTGAAACCATTCCCACTG   | GCTGTGACAACCCTTGACT     | 110                | 1291   | urea transporter 2                                        |
| <i>slc20a1b</i>           | GTATGGTGGCGTGGGTATCT   | AGGCCAGTTCGATGCTAAAA    | 119                | 2828   | sodium-dependent phosphate transporter 1-B                |

| <b>Gene symbol</b>   | <b>5'-Forward primer-3'</b> | <b>5'-Reverse primer-3'</b> | <b>Amplicon size (bp)</b> | <b>Contig</b> | <b>Description</b>                                  |
|----------------------|-----------------------------|-----------------------------|---------------------------|---------------|-----------------------------------------------------|
| <i>slc27a4/fatp4</i> | CTCTGTTCCCTGTGGGACTC        | CCAAGGCTGTGATCTTTGGT        | 128                       | 34423         | long-chain fatty acid transport protein 4           |
| <i>slc30a5/znt5</i>  | CACGGTCTCCAGGAAGTTGT        | AGGACCACGACTCCACTTTG        | 143                       | 22625         | zinc transporter 5                                  |
| <i>slc30a9/znt9</i>  | GTGTAGACCCAAGCCAGGAG        | CAGGCCAGAGGACAACATTT        | 106                       | 17008         | zinc transporter 9                                  |
| <i>slc9a2/nhe2</i>   | TTAGGGGCAGCATGTAGAGG        | TCAGCATTGGCCTGATAGTG        | 102                       | 68440         | sodium/hydrogen exchanger 2                         |
| <i>slc9a3/nhe3</i>   | TCTGTACGTGGCTCTCATGG        | CAGCAGGAGAAGATCCCAAA        | 147                       | 6578          | sodium/hydrogen exchanger 3                         |
| <i>vdac2</i>         | GACCAGACCAGAAAGGGTCA        | CAGCACACGCTTTGGTATTG        | 145                       | 6738          | voltage-dependent anion-selective channel protein 2 |
